# Supplementary material for: Effect of paclitaxel-coated balloon angioplasty on side branch lesion and cardiovascular outcomes in patients with de novo true coronary bifurcation lesions undergoing percutaneous coronary intervention
Source: Research Square preprint supplement (doi:10.21203/rs.3.rs-391987/v1), 2021-04-12
Supplement: Supplementary file 1 [file da913ccbaa65e875938df434.docx]

.
